# Supplementary material for: Association of pronounced elevation of NET formation and nucleosome biomarkers with mortality in patients with septic shock
Source: PubMed Central journal article supplement (PMC10581968; doi:10.1186/s13613-023-01204-y), 2023-10-17
Supplement: 13613_2023_1204_MOESM1_ESM.pdf [file 13613_2023_1204_MOESM1_ESM.pdf]

**Association of pronounced Elevation of NET formation and Nucleosome  
Biomarkers with Mortality in Patients with Septic Shock**

Additional



**Additional FIGURES**

Figure S1

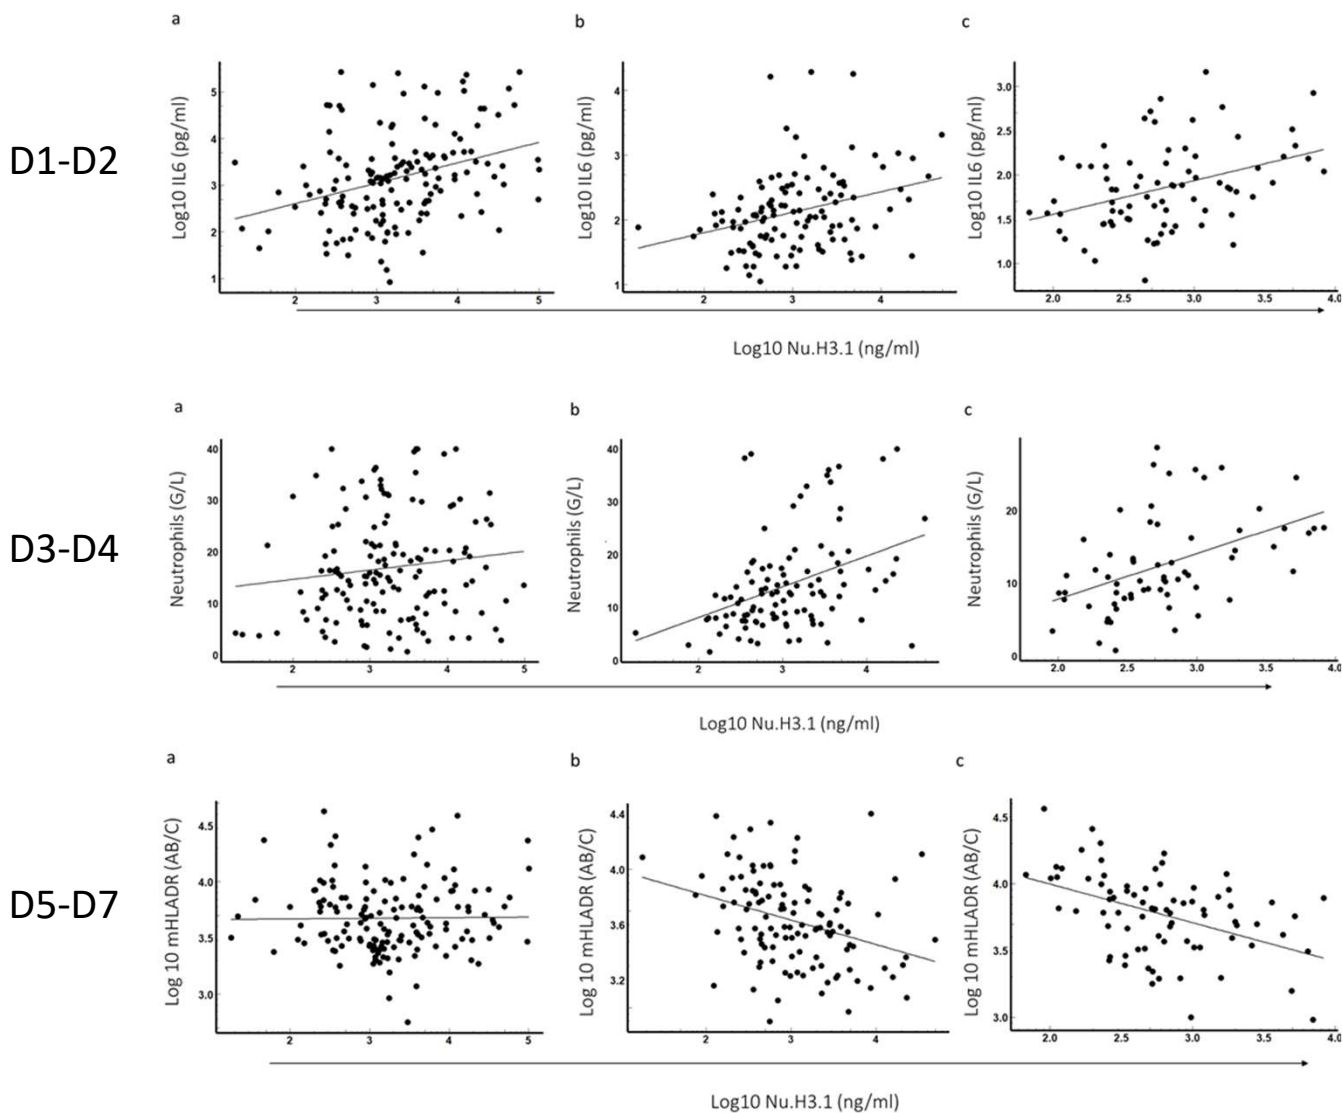

| Time Points | IL-6 |          | Neutrophils |          | mHLADR |          |
|-------------|------|----------|-------------|----------|--------|----------|
|             | r    | P        | r           | P        | r      | P        |
| (a) D1-D2   | 0.35 | < 0,0001 | 0.1         | ns       | -0,005 | 0,94     |
| (b) D3-D4   | 0.32 | < 0,001  | 0.41        | < 0,001  | -0,4   | < 0,0001 |
| (c) D6-D8   | 0.36 | < 0,001  | 0.5         | < 0,0001 | -0,4   | < 0,0001 |

**Additional file 1** Figure S1. Correlation of nucleosome H3.1 levels with immunological parameters. Figures depict correlations at different time points a (D1-D2), b (D3-D4), c (D6-D8). Tables presented, providing Spearman's correlation coefficient and p-value calculated at different time points for the considered parameter.

Additional file 1:

Figure S2

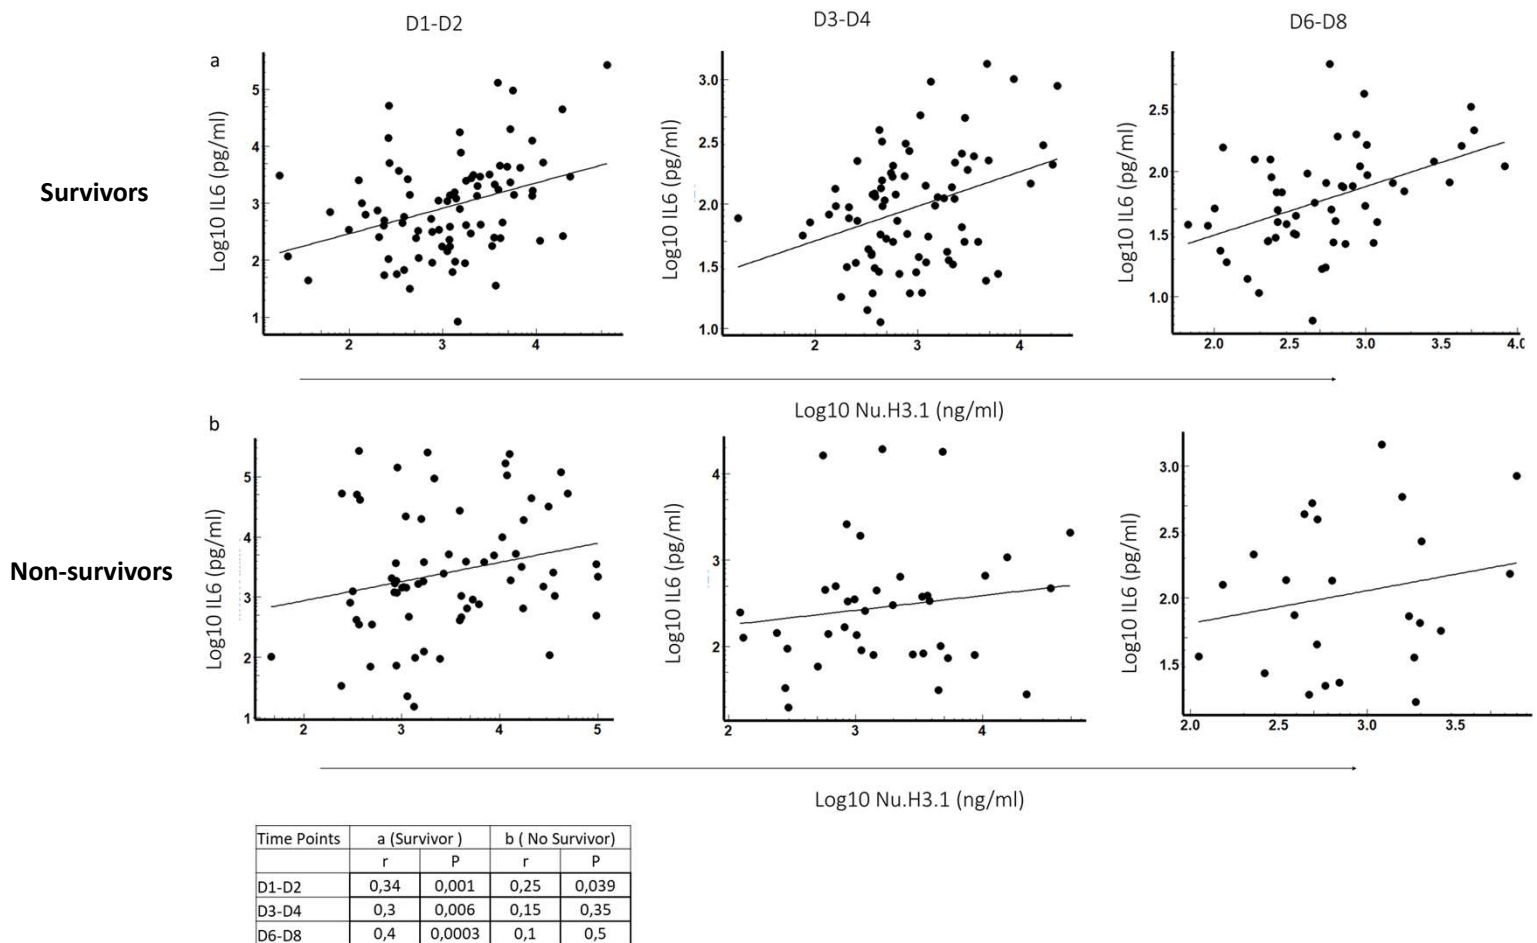

**Additional file 1** Figure S2. Correlation of nucleosome H3.1 levels with IL\_6. Figures depict correlations at different time points a; for survivors and b; for no survivors. Tables presented, providing Spearman's correlation coefficient and p-value calculated at different time points respectively from top to bottom.

Additional file 1:

# Figure S3

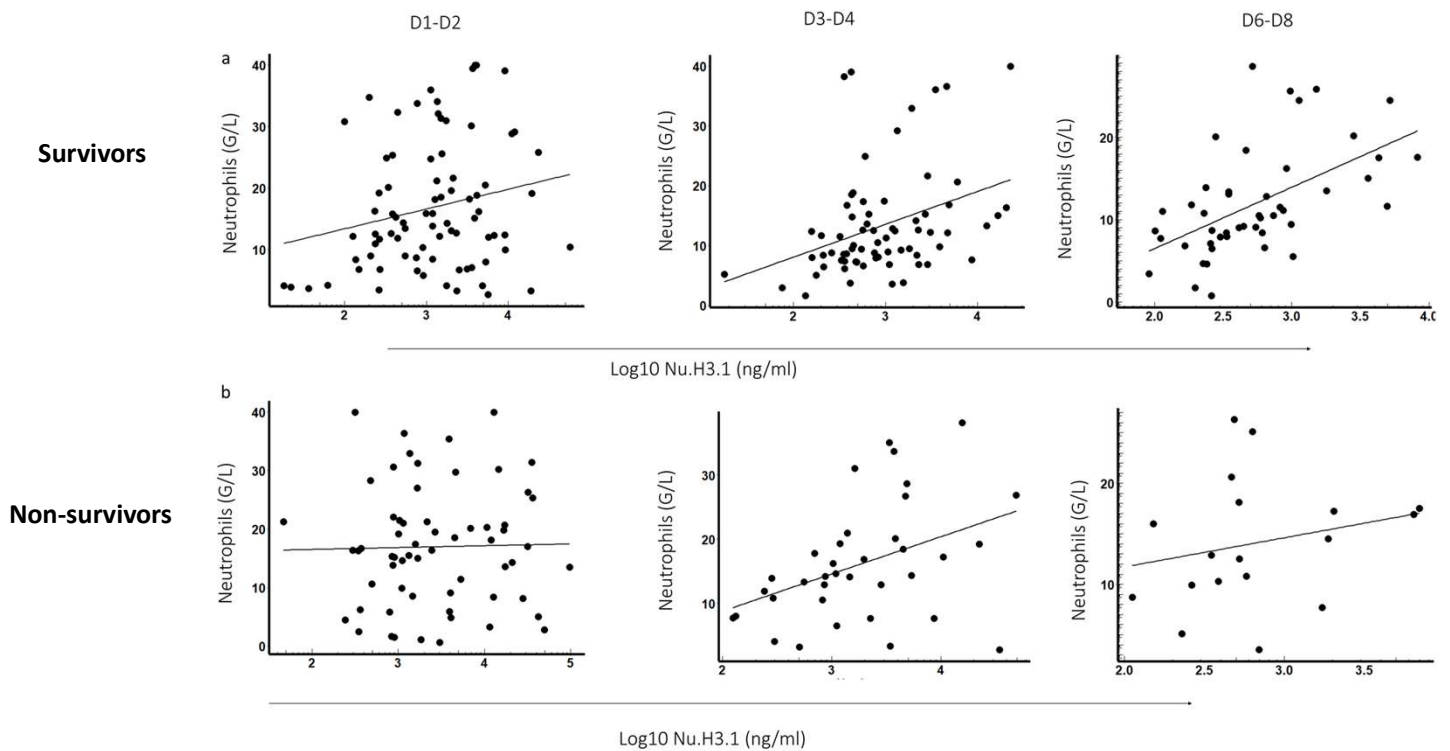

| Time Points | a (Survivor) |         | b ( No Survivor) |       |
|-------------|--------------|---------|------------------|-------|
|             | r            | P       | r                | P     |
| D1-D2       | 0,17         | 0,1     | 0,04             | 0,1   |
| D3-D4       | 0,38         | 0,0009  | 0,43             | 0,008 |
| D6-D8       | 0,59         | <0.0001 | 0,26             | 0,28  |

**Additional file 1 Figure S3. Correlation of nucleosome H3.1 levels with Neutrophils.** Figures depict correlations at different time points a; for survivors and b; for no survivors. Tables presented, providing Spearman's correlation coefficient and p-value calculated at different time points respectively from top to bottom.

Additional file 1:

Figure S4

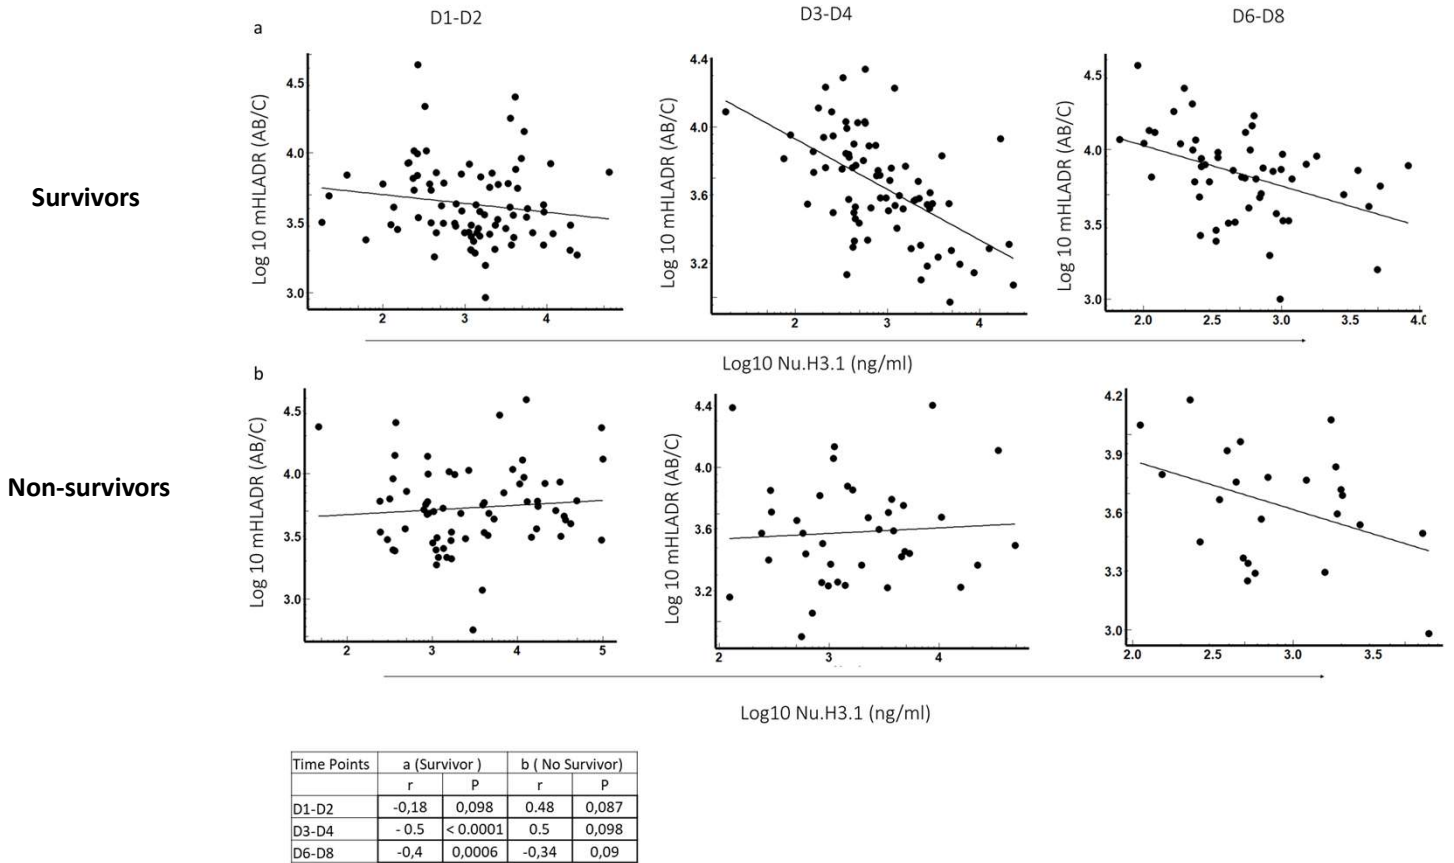

**Additional file 1** Figure S4. Correlation of nucleosome H3.1 levels with mHLADR. Figures depict correlations at different time points a; for survivors and b; for no survivors. Tables presented, providing Spearman's correlation coefficient and p-value calculated at different time points respectively from top to bottom.

Additional file 1:

# Figure S5

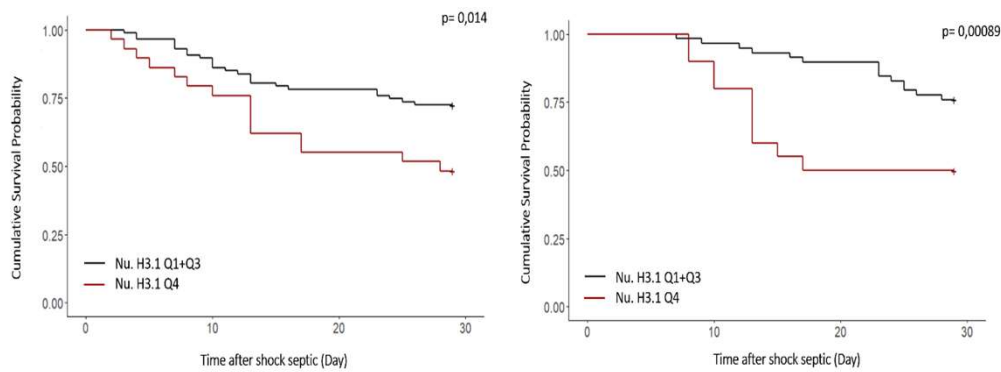

**additionalfile** Figure S5. Cumulative incidence of mortality up to one-month (Day 28). Patients were stratified to two groups based on Nu.H3.1 quartiles. Cumulative incidence curves of (A) D3-D4 and (B) D6-D8 based on Nu.H3.1 concentration. Cumulative incidence curves were estimated with Kaplan-Meier method. The p value was calculated by log rank test.

Additional file 1:

# Figure S6

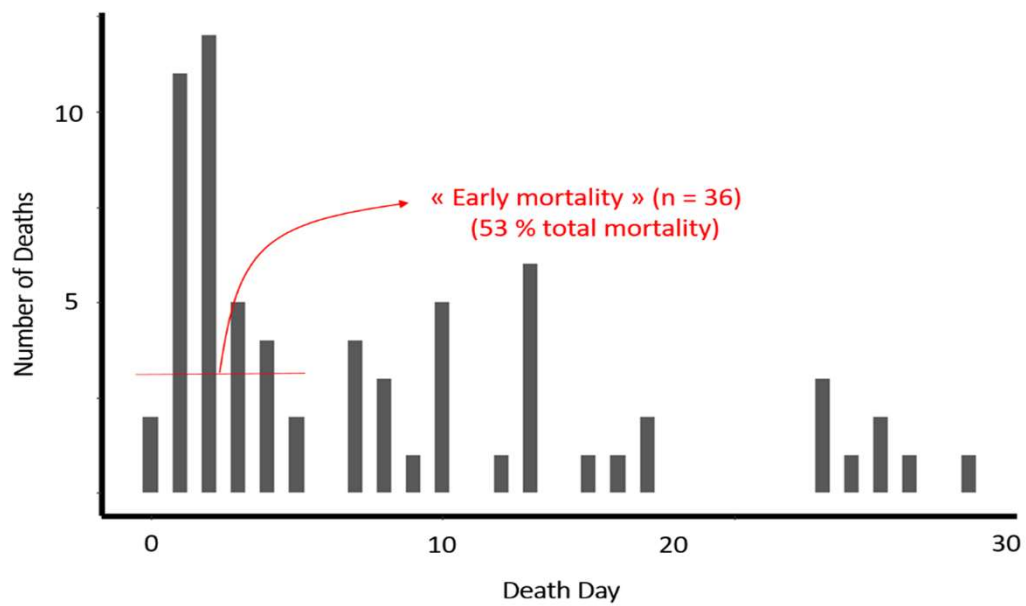

**Additional file 1** Figure S6. Histogram of distribution of number of deaths according to death days.

Additional file 1:
