# Supplementary material for: Association of pronounced elevation of NET formation and nucleosome biomarkers with mortality in patients with septic shock
Source: PubMed Central journal article supplement (PMC10581968; doi:10.1186/s13613-023-01204-y), 2023-10-17
Supplement: 13613_2023_1204_MOESM2_ESM.pdf [file 13613_2023_1204_MOESM2_ESM.pdf]

**Association of pronounced Elevation of NET formation and Nucleosome Biomarkers with Mortality in Patients with Septic Shock**

Additional file 2:  
Table S2

*Muzhda Haem Rahimi et al.*

**Additional file 2 Table S2** . Immunological results at different time points during the first week after ICU admission.

| Parametres           | D 1-2               | D 3-4              | D 6-8              | Reference values |
|----------------------|---------------------|--------------------|--------------------|------------------|
| IL-6 (pg/ml)         | 1335 (338 - 3872 )  | 114 (52 - 276)     | 68 (32 - 133)      | < 7              |
| mHLA-DR (AB/C)       | 4295 (2926 - 7011 ) | 3853 (2526 - 6919) | 6374 (3703 - 9298) | 15500 - 45000    |
| Leukocytes (G/L)     | 17.30 ( 9.7 - 26.5) | 16.7 (9.4 - 21)    | 12.9 (10.3 - 19.2) | 4 -10            |
| Neutrophils (G/L)    | 15.3 (8.6 - 21.8 )  | 12.5 (8 - 17.4)    | 11 (8.4 - 16.9)    | 2 - 7.5          |
| Lymphocytes (G/L)    | 0.97 (0.5 -1.6 )    | 0.8 (0.5 - 1.2)    | 1.04 (0.83 - 1.35) | 1 - 2.8          |
| CD4 (Cells/ $\mu$ l) | na                  | 338 (221 - 541 )   | na                 | 336 - 1126       |

Reference values are provided by routine clinical immunology laboratories at our institution. Results as median and (interquartile range). Na = not available.
